# Supplementary material for: NAIL: an evolutionarily conserved lncRNA essential for licensing coordinated activation of p38 and NFκB in colitis
Source: HighWire-hosted journal article supplement (doi:10.1136/gutjnl-2020-322980), 2020-11-25

# Sup-Fig.2

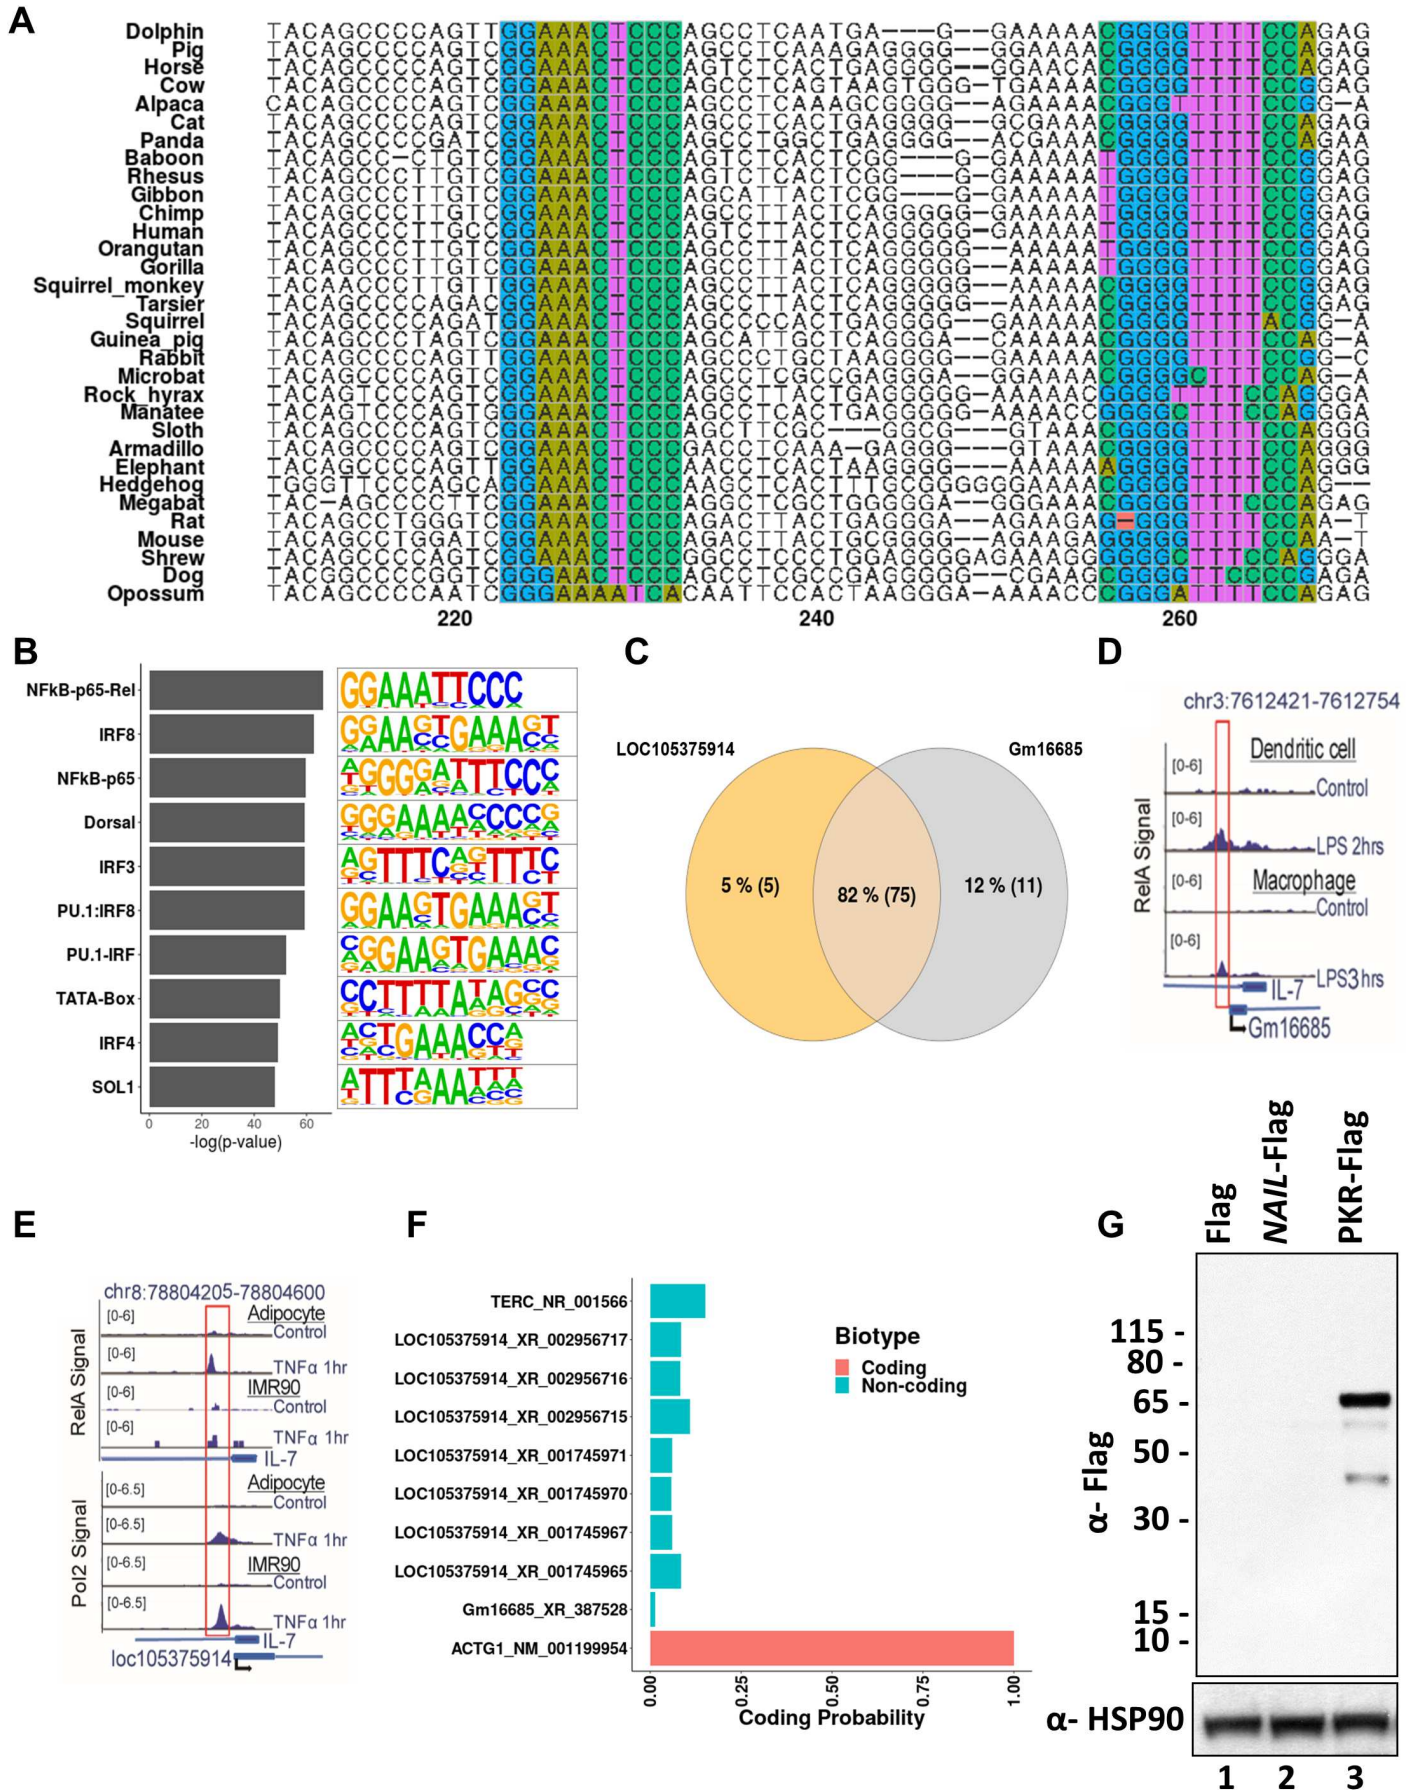

Supplement: gutjnl-2020-322980supp003_data_supplement.pdf [file gutjnl-2020-322980supp003_data_supplement.pdf]
