# Supplementary material for: NAIL: an evolutionarily conserved lncRNA essential for licensing coordinated activation of p38 and NFκB in colitis
Source: HighWire-hosted journal article supplement (doi:10.1136/gutjnl-2020-322980), 2020-11-25

## Sup-Fig. 5

A

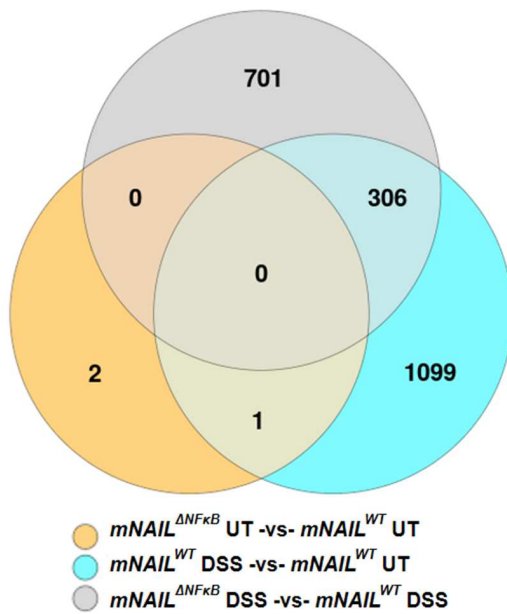

| Comparisons                                           | Total differential expressed genes |
|-------------------------------------------------------|------------------------------------|
| $mNAIL^{\Delta NF\kappa B}$ UT -vs- $mNAIL^{WT}$ UT   | 3                                  |
| $mNAIL^{WT}$ DSS -vs- $mNAIL^{WT}$ UT                 | 1406                               |
| $mNAIL^{\Delta NF\kappa B}$ DSS -vs- $mNAIL^{WT}$ DSS | 1007                               |

B

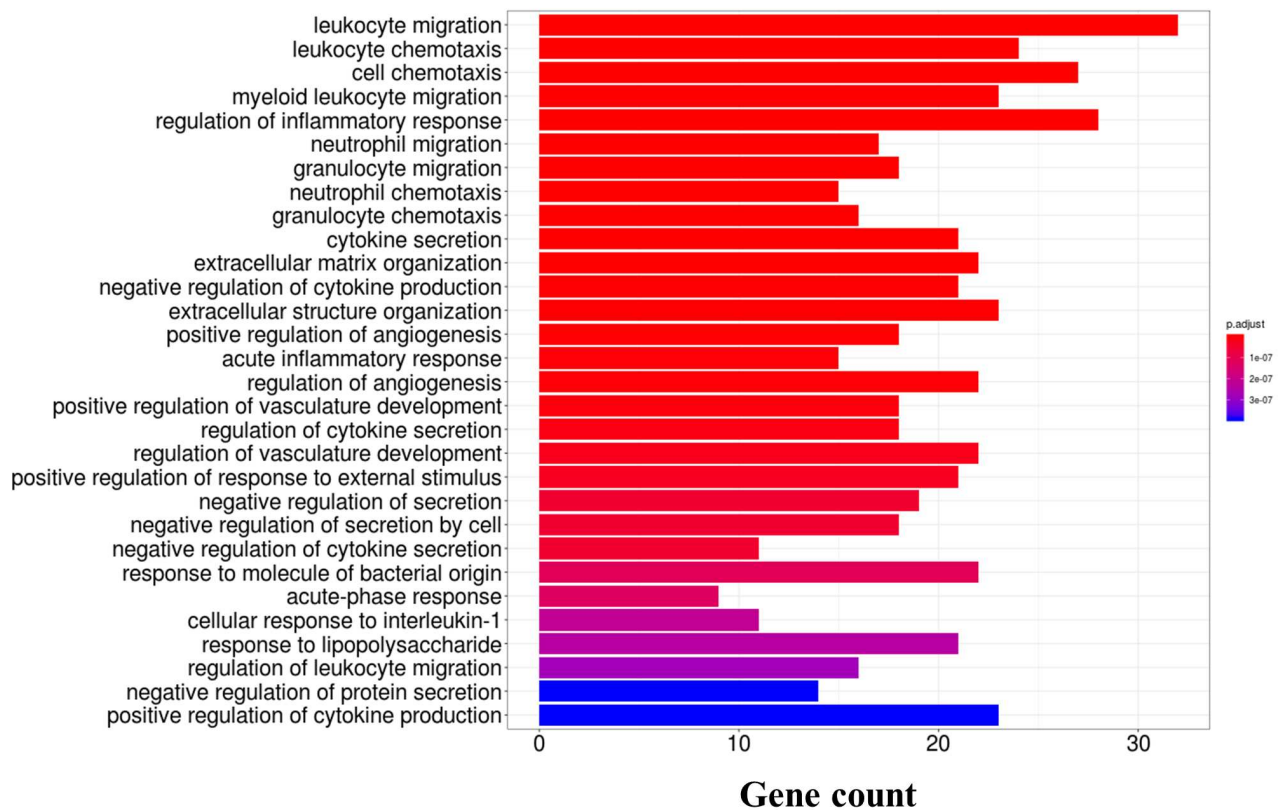

Supplement: gutjnl-2020-322980supp006_data_supplement.pdf [file gutjnl-2020-322980supp006_data_supplement.pdf]
