# Supplementary material for: NAIL: an evolutionarily conserved lncRNA essential for licensing coordinated activation of p38 and NFκB in colitis
Source: HighWire-hosted journal article supplement (doi:10.1136/gutjnl-2020-322980), 2020-11-25
Supplement: gutjnl-2020-322980supp010_data_supplement.pdf [file gutjnl-2020-322980supp010_data_supplement.pdf]

**Sup-Table 1**

| REAGENT or RESOURCE                   | SOURCE          | IDENTIFIER      |
|---------------------------------------|-----------------|-----------------|
| <b>Antibodies</b>                     |                 |                 |
| anti-p-p38 (Thr180/Tyr182) 3D7        | Cell signalling | Cat #9215S      |
| anti-p38                              | Cell signalling | Cat #9212       |
| anti-p-p65 (Ser536)                   | Cell signalling | Cat #3031L      |
| anti-p65                              | Santa Cruz      | Cat #sc-8008    |
| anti-Actin                            | Sigma           | Cat #A2066      |
| GAPDH (6C5)                           | Santa Cruz      | Cat #sc-32233   |
| p-IKK $\alpha$ / $\beta$ (Ser176/180) | Cell signalling | Cat #2697S      |
| IKK $\alpha$ / $\beta$ (H-470)        | Santa Cruz      | Cat #sc-7607    |
| IKK $\gamma$ (FL-419)                 | Santa Cruz      | Cat #sc-8330    |
| anti-p65 (ChIP, IP)                   | Santa Cruz      | Cat #sc-372     |
| anti-Wip1 (RIP)                       | Cell signalling | Cat #11901      |
| anti-Wip1(WB)                         | Santa Cruz      | Cat # sc-376257 |
| Dyskerin (H-300)                      | Santa Cruz      | Cat #sc-48794   |
| anti-IL7                              | R&Dsystems      | Cat # AF407     |
| P-SEK1/MKK4(T261)                     | Cell signalling | Cat # 9151S     |
| anti-SEK1/MKK4                        | Cell signalling | Cat # 9152S     |
| p-TAK1 (T187)                         | Cell signalling | Cat # 4536S     |
| p-IkBa (S32)                          | Cell signalling | Cat # 2859L     |
| p-SAPK/JNK (Thr183/Tyr185)            | Cell signalling | Cat # 9251      |
| anti-P-MKK3/MKK6 (Ser189/207)         | Cell signalling | Cat # 9231      |
| anti-Cleaved Caspase-3 (Asp175)       | Cell signalling | Cat #9664L      |
| PE-CD11b                              | BD              | Cat #553311     |
| FITC-Ly6G                             | Biolegend       | Cat #127606     |
| BV711-Ly6C                            | Biolegend       | Cat #128037     |
| PE-CD34                               | BD              | Cat #551387     |
| PeCy7-IL7RA                           | BD              | Cat #560733     |
| PercepCy5.5-c-kit                     | BD              | Cat #560557     |
| FITC-Sea1/Anti-Ly-6A/E                | BD              | Cat #553335     |
| APCcy7-CD16/32                        | BD              | Cat #560541     |
| APC Mouse Lineage Antibody Cocktail   | BD              | Cat #558074     |

|                                                                                           |                         |                       |
|-------------------------------------------------------------------------------------------|-------------------------|-----------------------|
| AF488-p-NF- $\kappa$ B p65 (Ser536) (93H1)                                                | CST                     | Cat #4886             |
| AF488-p-p38 MAPK (Thr180/Tyr182) (3D7)                                                    | CST                     | Cat #41768            |
| <b>Chemicals, recombinants proteins, commercial kits</b>                                  |                         |                       |
| Recombinant Human TNF-alpha Protein 210                                                   | R&Dsystems              | Cat #210-TA           |
| Terminal deoxynucleotidyltransferase                                                      | Promega                 | Cat #M1871            |
| RQ1 RNase-Free DNase                                                                      | Promega                 | Cat #M6101            |
| Recombinant RNasin ribonuclease inhibitor                                                 | Promega                 | Cat #N2111            |
| T7 RNA polymerase                                                                         | Promega                 | Cat #P2075            |
| 10X Biotin RNA labelling mix                                                              | Roche                   | Cat #11685597910      |
| Tak1 inhibitor 5Z-7-Oxozeaenol                                                            | Sigma                   | Cat #O9890-1MG        |
| E. coli LPS                                                                               | Sigma                   | Cat #L2654 and #L2630 |
| Dextran sulfate sodium salt, colitis grade                                                | MP Biomedicals          | Cat # 9011-18-1       |
| Disuccinimidyl glutarate (DSG)                                                            | Thermo Fisher           | Cat #20593            |
| X-tremeGENE 9 DNA transfection reagent                                                    | Roche                   | Cat #6365779001       |
| X-tremeGENE siRNA transfection reagent                                                    | Roche                   | Cat #4476093001       |
| <b>Experimental Models: Organisms/Strains</b>                                             |                         |                       |
| Mouse: wild-type: C57BL/6                                                                 | Invivos                 | N/A                   |
| Mouse: wild type Balb/c                                                                   | Invivos                 | N/A                   |
| Mouse: <i>mNAIL<sup>ANFKB</sup></i>                                                       | Masa's group            | This study            |
| MEFs: WT, p65 <sup>-/-</sup> , Ikk $\beta$ <sup>-/-</sup> and Ikk $\gamma$ <sup>-/-</sup> | Tergaonkar et al., 2003 | N/A                   |
| <b>Oligonucleotides</b>                                                                   |                         |                       |
| RT-qPCR_Gm16685 Fw<br>(CCCTACAGGAAGACCAACCA)                                              | IDT                     | N/A                   |
| RT-qPCR_Gm16685 Rv<br>(CTAGGCCATCCTCTGCTACG)                                              | IDT                     | N/A                   |
| RT-qPCR_mTNFa Fw<br>(ACAGAAAGCATGATCCGCGAC)                                               | IDT                     | N/A                   |
| RT-qPCR_mTNFa Rv (GAAGCCCCCATCTTTGG)                                                      | IDT                     | N/A                   |
| RT-qPCR_mIL7 Fw (TGGAATTCCTCCACTGATCC)                                                    | IDT                     | N/A                   |
| RT-qPCR_mIL7 Rv (TGGTTCATTATTCGGGCAAT)                                                    | IDT                     | N/A                   |
| RT-qPCR_mActin Fw<br>(CTGTATCCCCTCCATCGTG)                                                | IDT                     | N/A                   |
| RT-qPCR_mActin Rv<br>(CCTCGTCACCCACATAGGAG)                                               | IDT                     | N/A                   |

|                                                                       |                        |            |
|-----------------------------------------------------------------------|------------------------|------------|
| RTqPCR_mCCL2 Fw<br>(GCCCTCCATGTATACCAGACT)                            | IDT                    | N/A        |
| RTqPCR_mCCL2 Rv<br>(AGACCTCTCTTGAGCTTGGT)                             | IDT                    | N/A        |
| RT-qPCR_mIL1 $\beta$ Fw<br>(AAAGCTCTCCACCTCAATGG)                     | IDT                    | N/A        |
| RT-qPCR_mIL1 $\beta$ Rv2<br>(TCTTCTTGGGTATTGCTTGG)                    | IDT                    | N/A        |
| CRISPR Genotyping_Gm16685 Fw<br>(GCATTCCCTTAGGTAGACTCC)               | IDT                    | N/A        |
| CRISPR Genotyping_Gm16685 Rv<br>(GGGAGTGATTATGGGTGGTGAG)              | IDT                    | N/A        |
| Gm16685 gRNA #1<br>(CACCTAGGGTTTAAAAGCGCATCC)                         | IDT                    | N/A        |
| Gm16685 gRNA #2<br>(CACCAGTCTGGGAGTTTCCGATCC)                         | IDT                    | N/A        |
| Gm16685 siRNA<br>(GGAATAATGATAGCAACTACT)                              | IDT                    | N/A        |
| Gm16685 siRNA<br>(CAACCTCTCTAATCAGTCTCTTTCT)                          | IDT                    | N/A        |
| Wip1 siRNA<br>(CTTGTGGGGTTTCATCAAGAAGCAG)                             | IDT                    | N/A        |
| Mouse IL7 transcript variant 4 siRNA#1<br>(AGCTCAGAACTTCATGGAGAATGAA) | IDT                    | N/A        |
| Mouse IL7 transcript variant 4 siRNA#1<br>(AAAGGACAGAUCAUUGGAAAACCCC) | IDT                    | N/A        |
| Mouse IL7 siRNA#1<br>(GACAGGAACTGATAGTAAT)                            | IDT                    | N/A        |
| Mouse IL7 siRNA#2<br>(GCATATGAGAGTGTACTGA)                            | IDT                    | N/A        |
| <b>Plasmids</b>                                                       |                        |            |
| pX458 –GFP                                                            | Addgene                | Cat #48138 |
| pX458-DsRed                                                           | Akincilar et al., 2016 | N/A        |
