# Supplementary figures and images for: NAIL: an evolutionarily conserved lncRNA essential for licensing coordinated activation of p38 and NFκB in colitis
Source: PubMed Central journal article supplement — Gut. 2020 Nov 25;70(10):1857–71. doi: 10.1136/gutjnl-2020-322980 (PMC8458091; doi:10.1136/gutjnl-2020-322980), 2020-11-25

## Sup-Fig.1

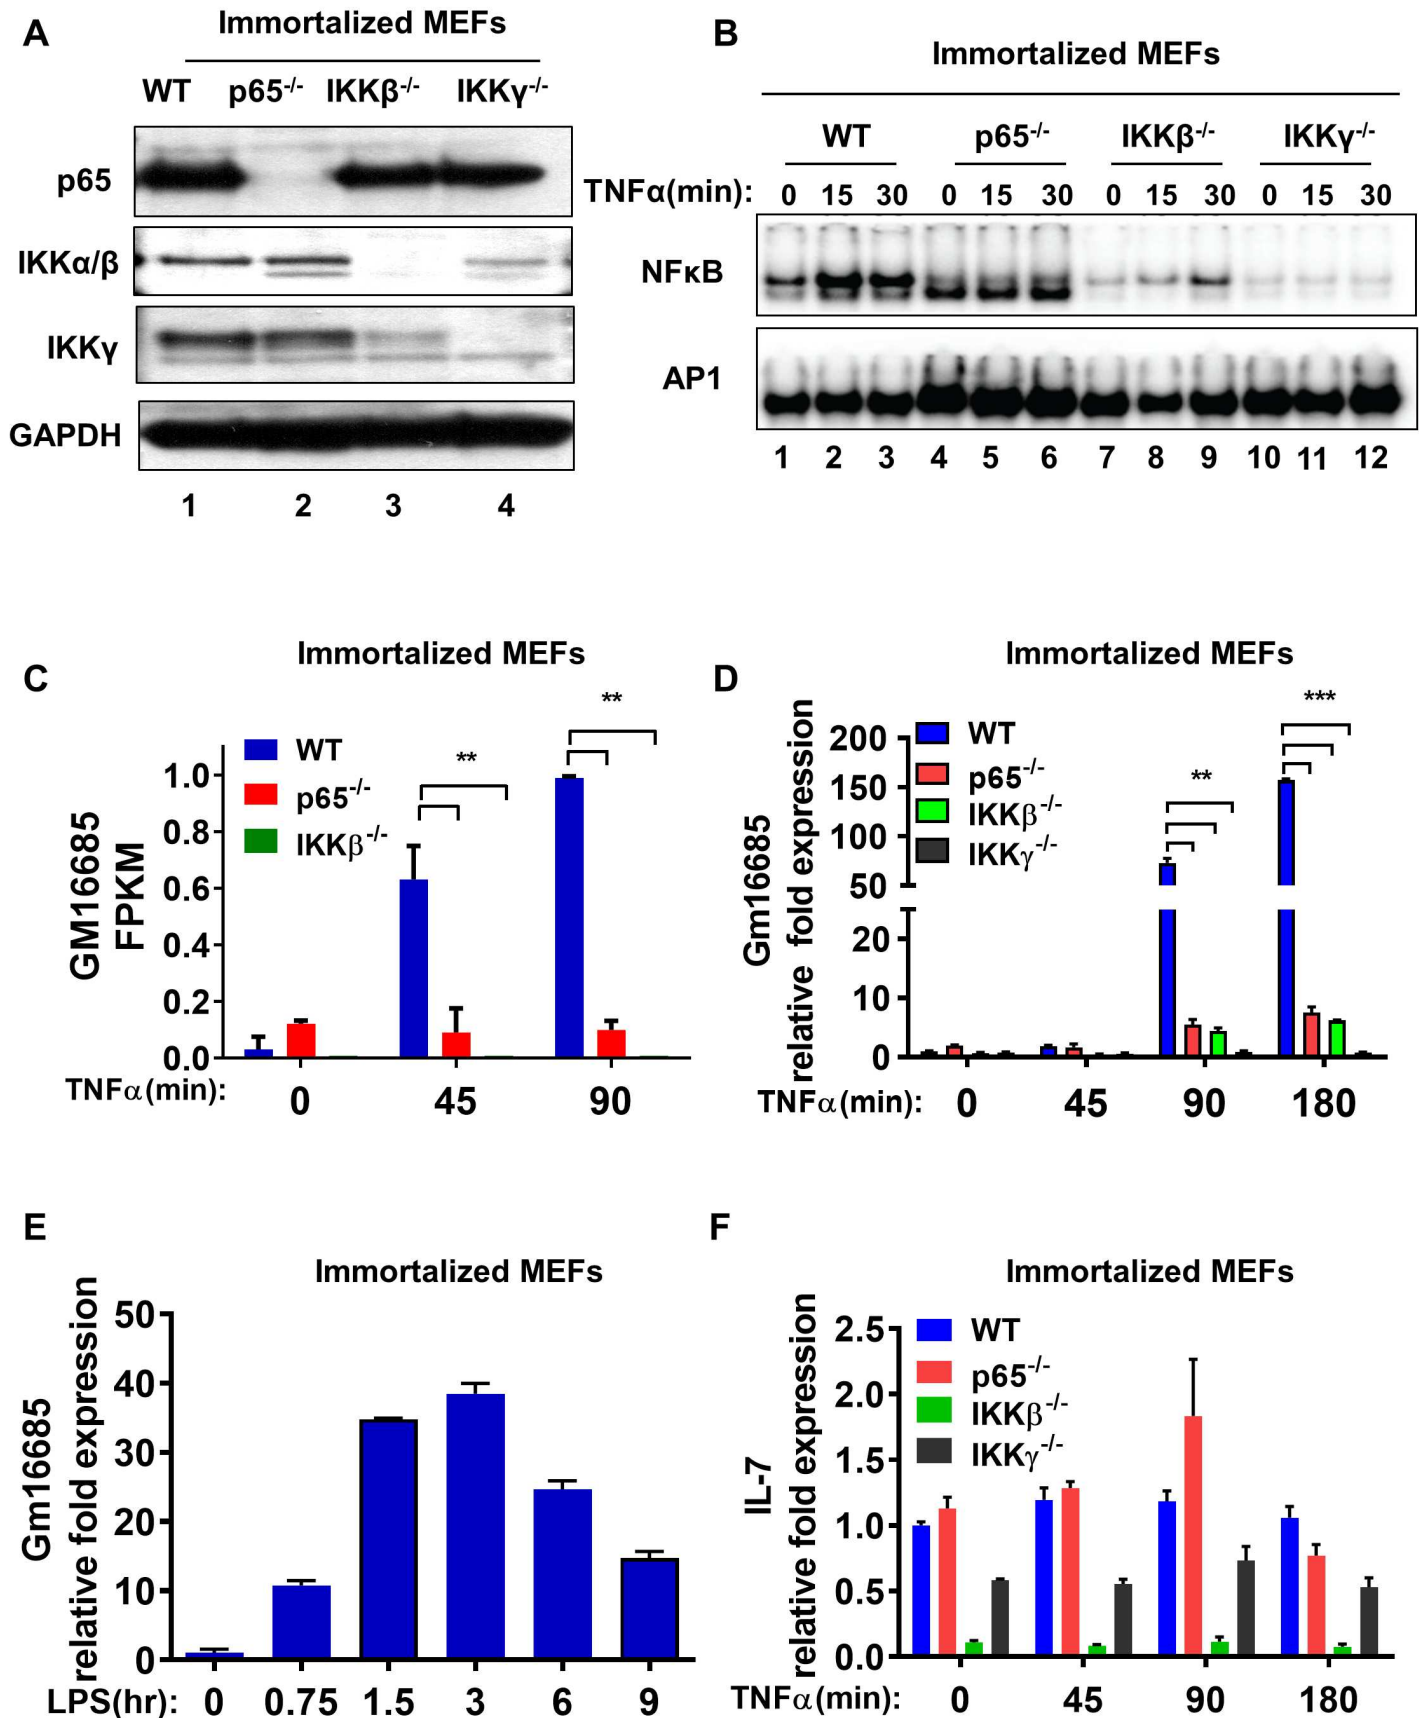

Supplement: gutjnl-2020-322980supp002.pdf [file gutjnl-2020-322980supp002.pdf]

## Sup-Fig. 8

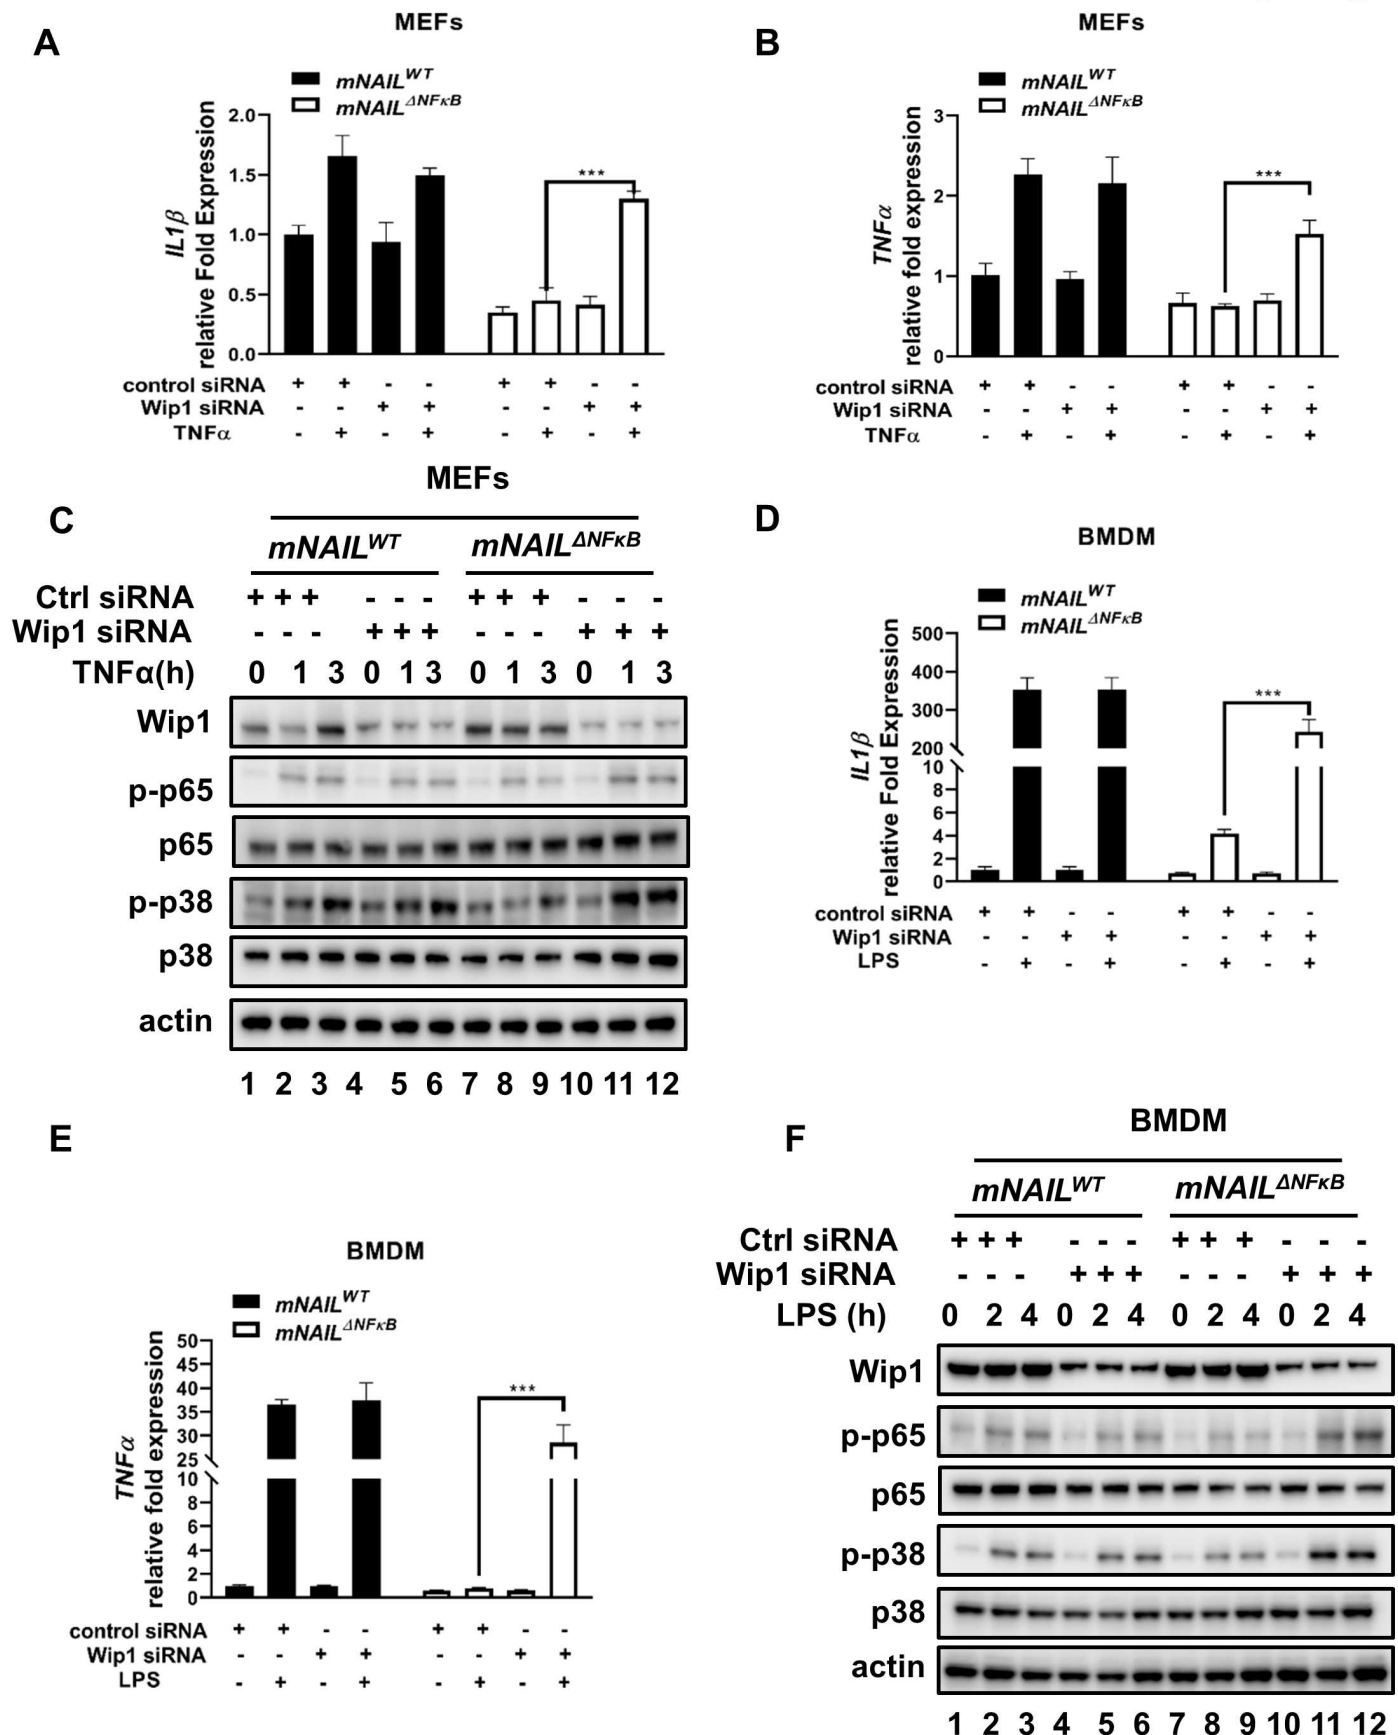

Supplement: gutjnl-2020-322980supp009.pdf [file gutjnl-2020-322980supp009.pdf]
