# Supplementary figures and images for: NAIL: an evolutionarily conserved lncRNA essential for licensing coordinated activation of p38 and NFκB in colitis
Source: HighWire-hosted journal article supplement (doi:10.1136/gutjnl-2020-322980), 2020-11-25

## Sup-Fig.3

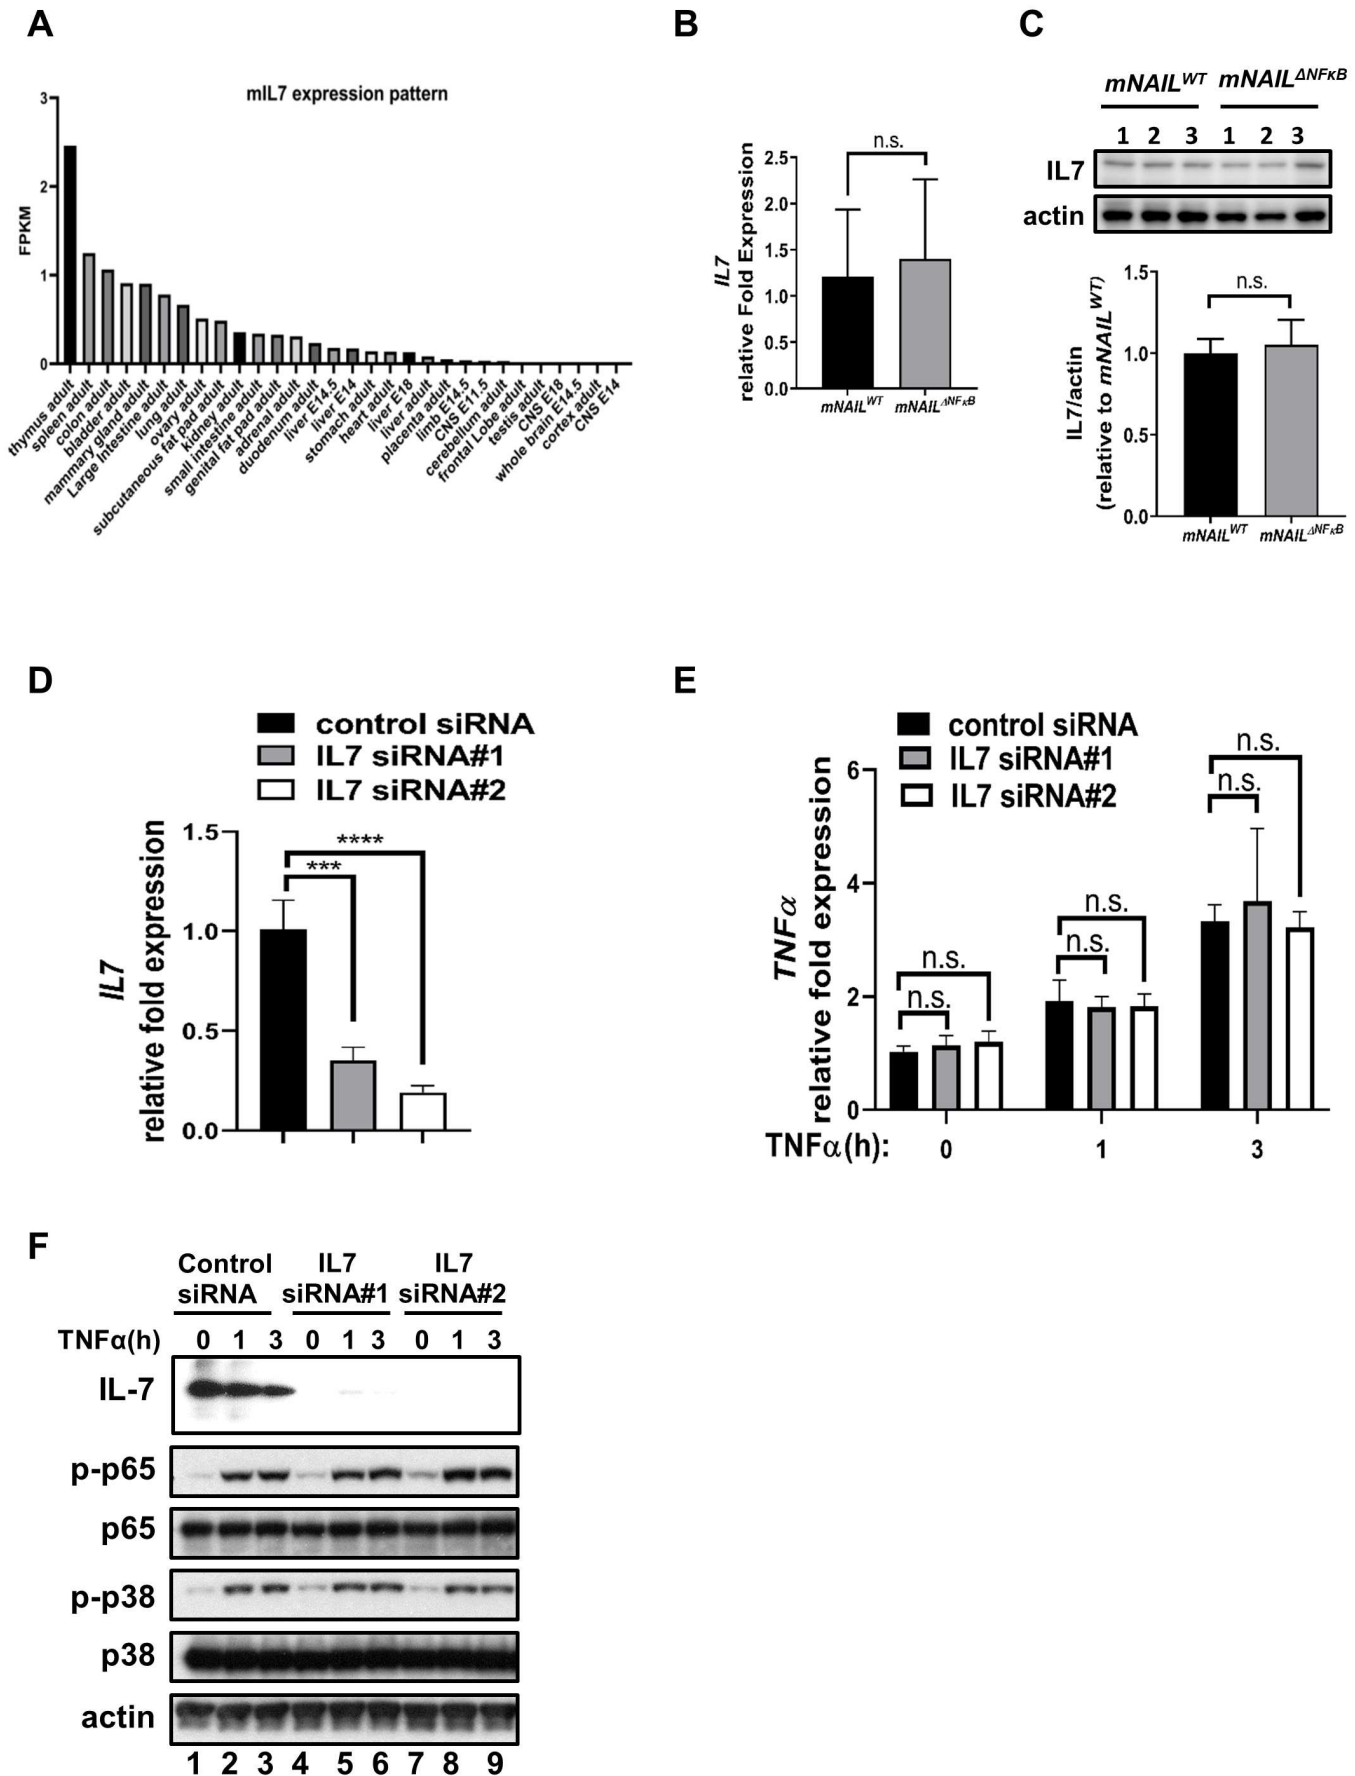

Supplement: gutjnl-2020-322980supp004_data_supplement.pdf [file gutjnl-2020-322980supp004_data_supplement.pdf]

## Sup-Fig. 4

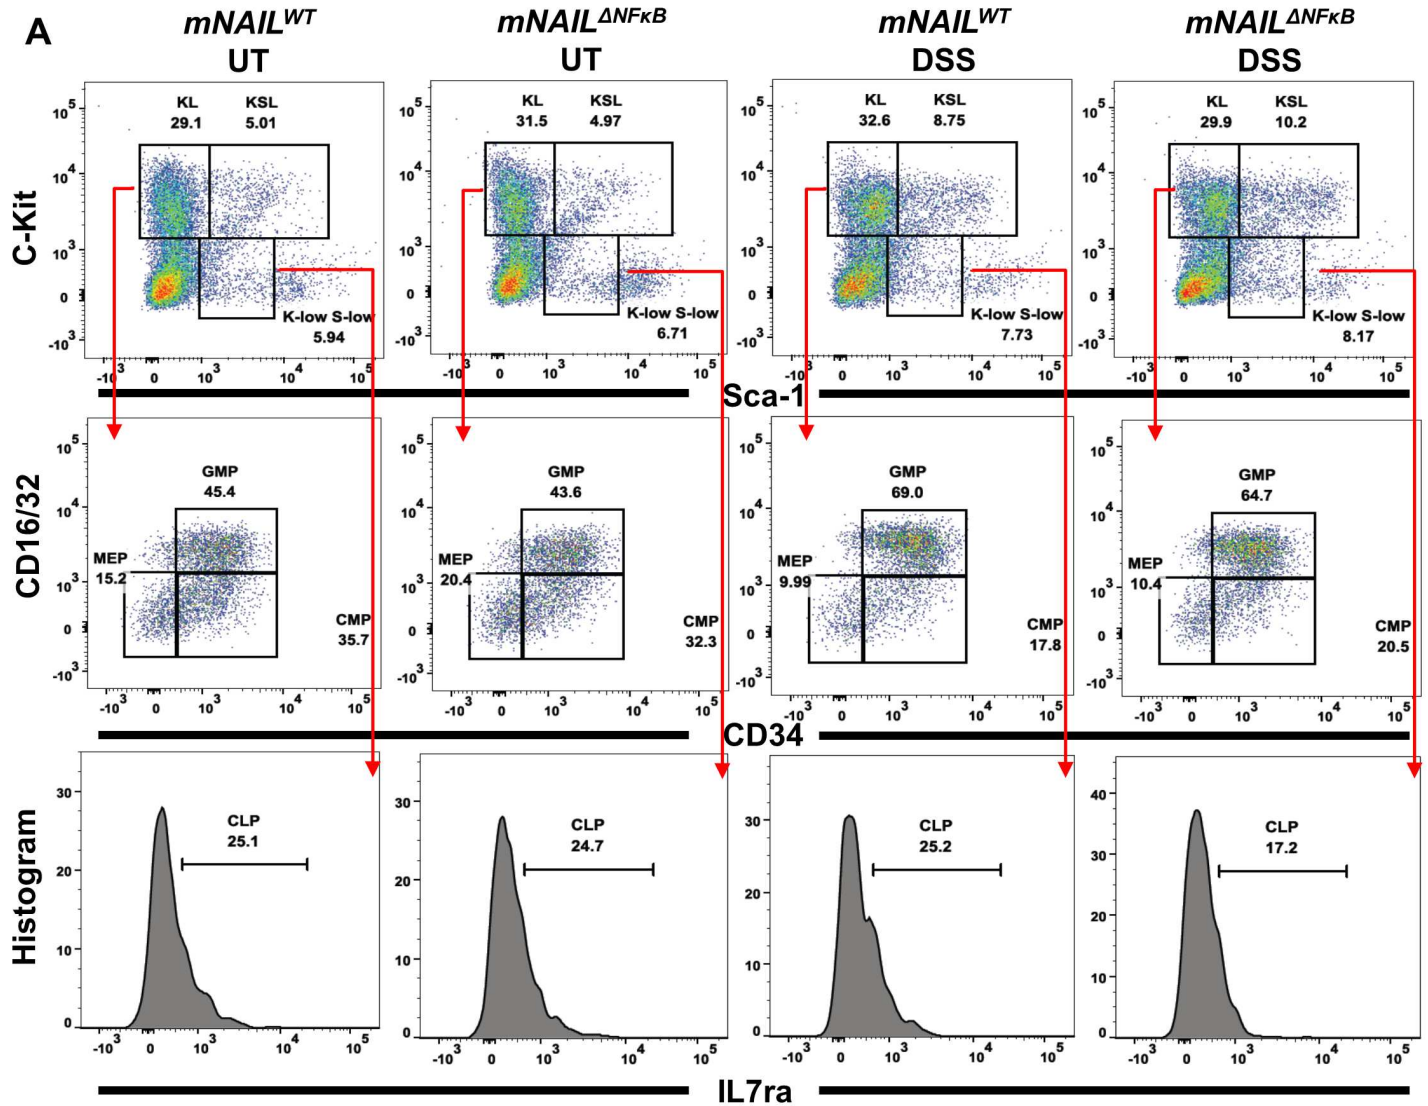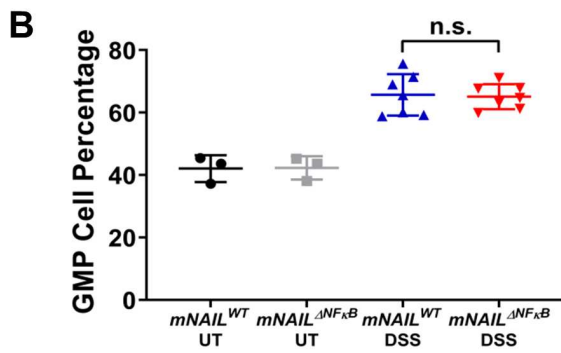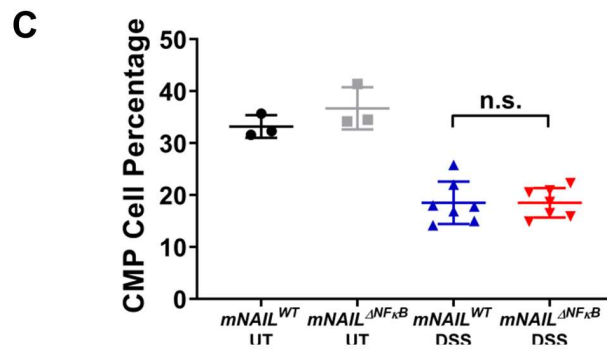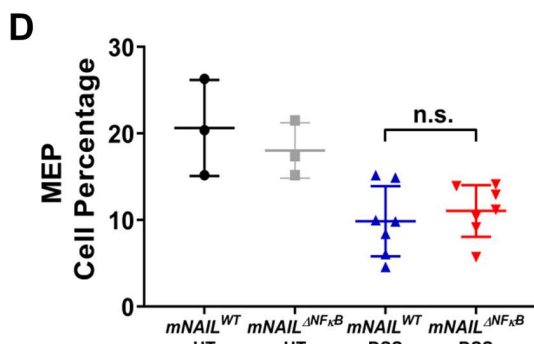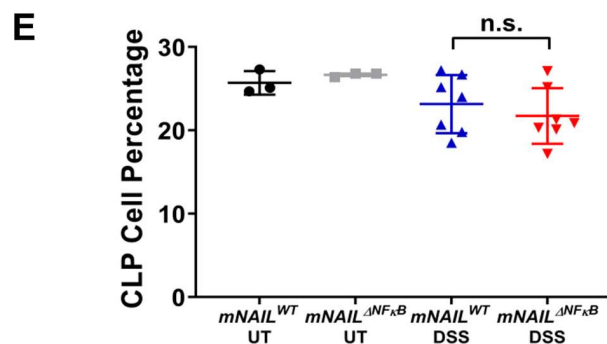

Supplement: gutjnl-2020-322980supp005_data_supplement.pdf [file gutjnl-2020-322980supp005_data_supplement.pdf]

## Sup-Fig. 6

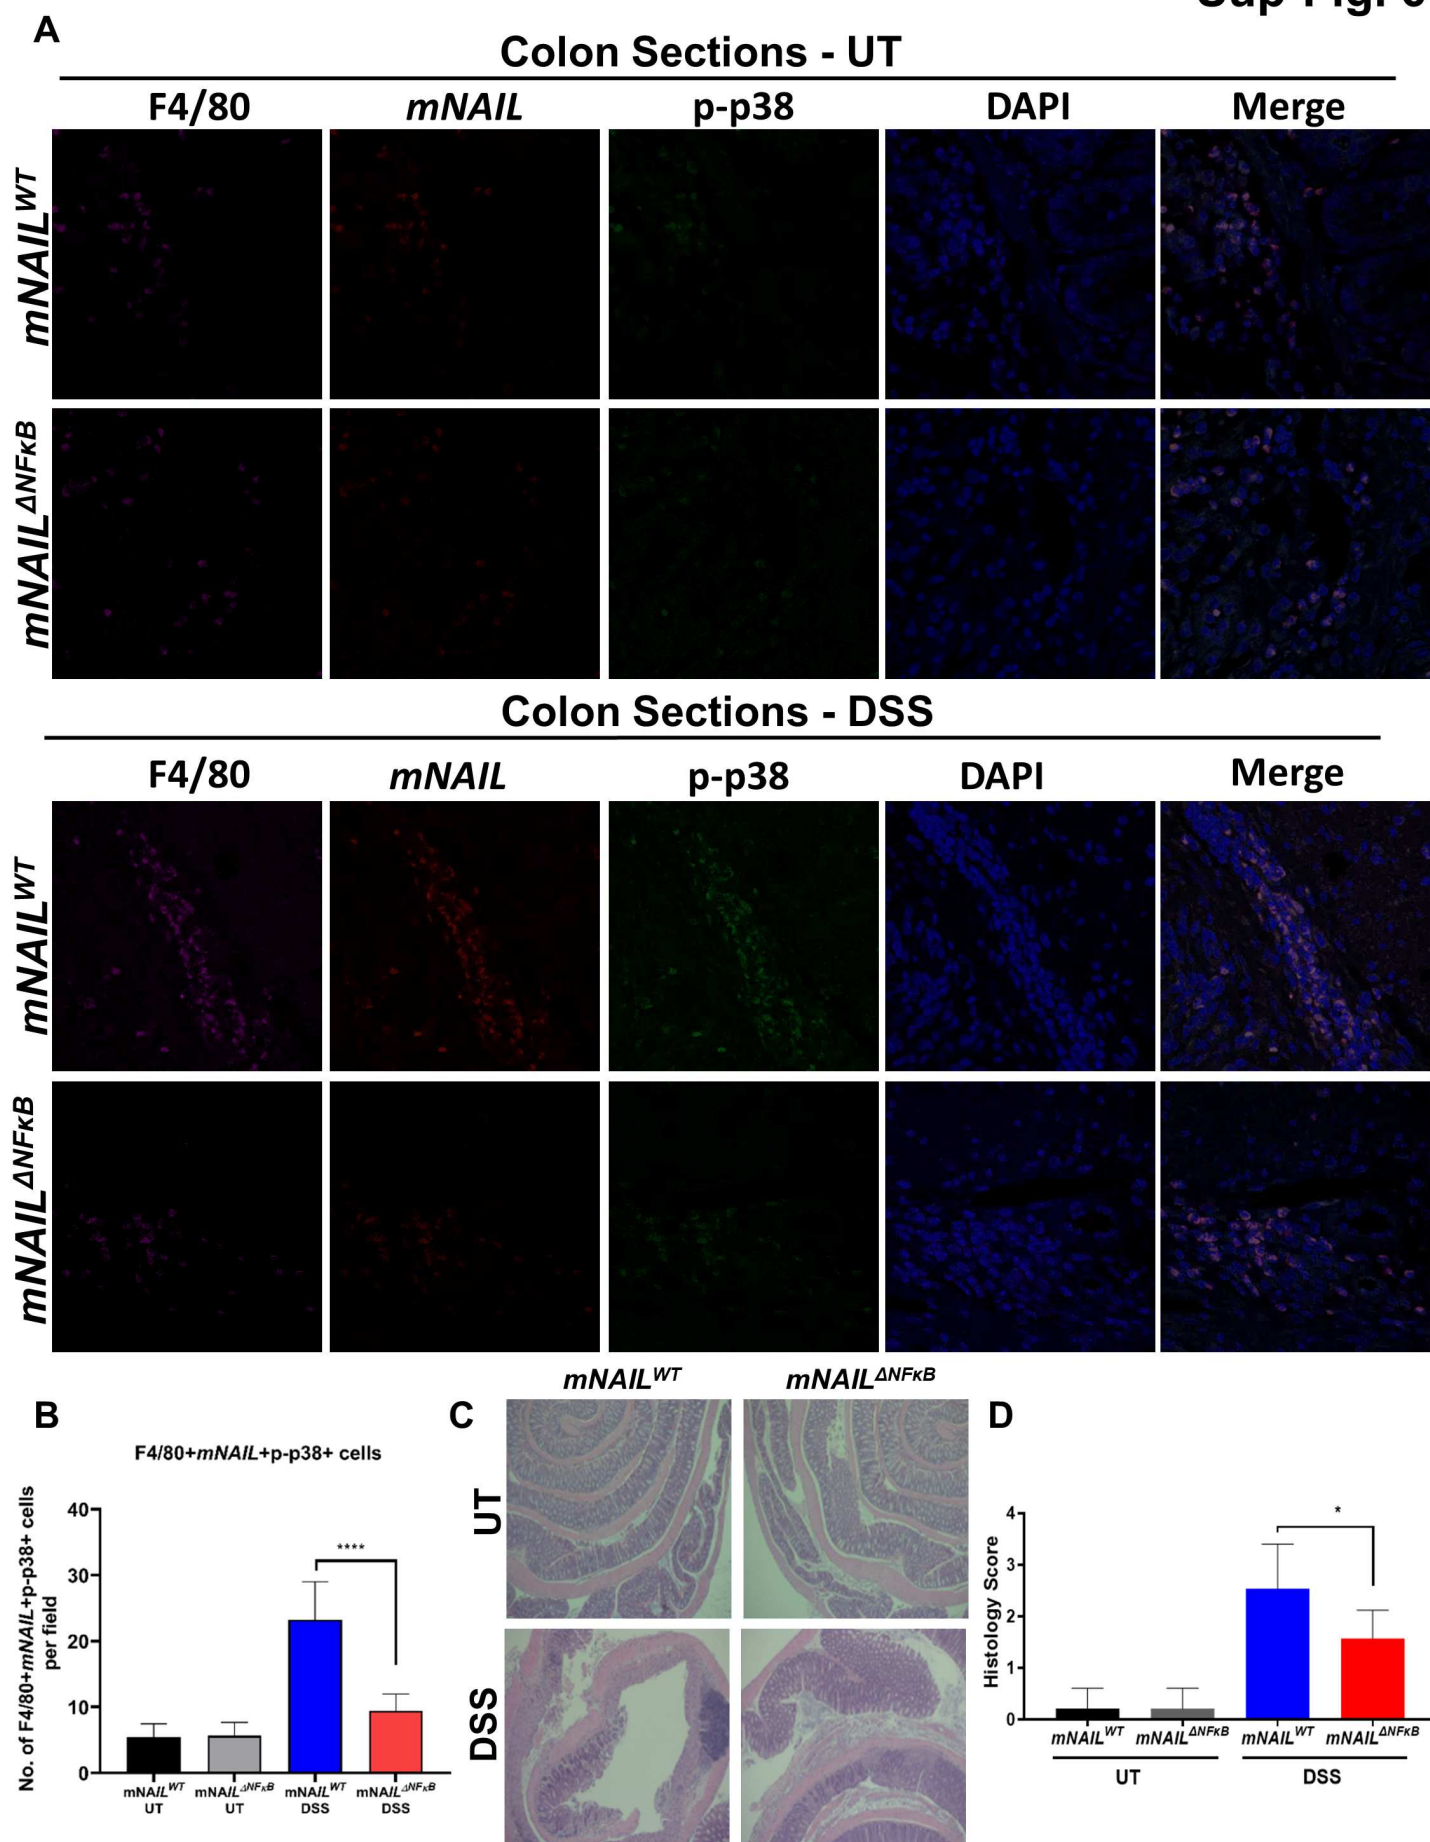

Supplement: gutjnl-2020-322980supp007_data_supplement.pdf [file gutjnl-2020-322980supp007_data_supplement.pdf]

## Sup-Fig. 7

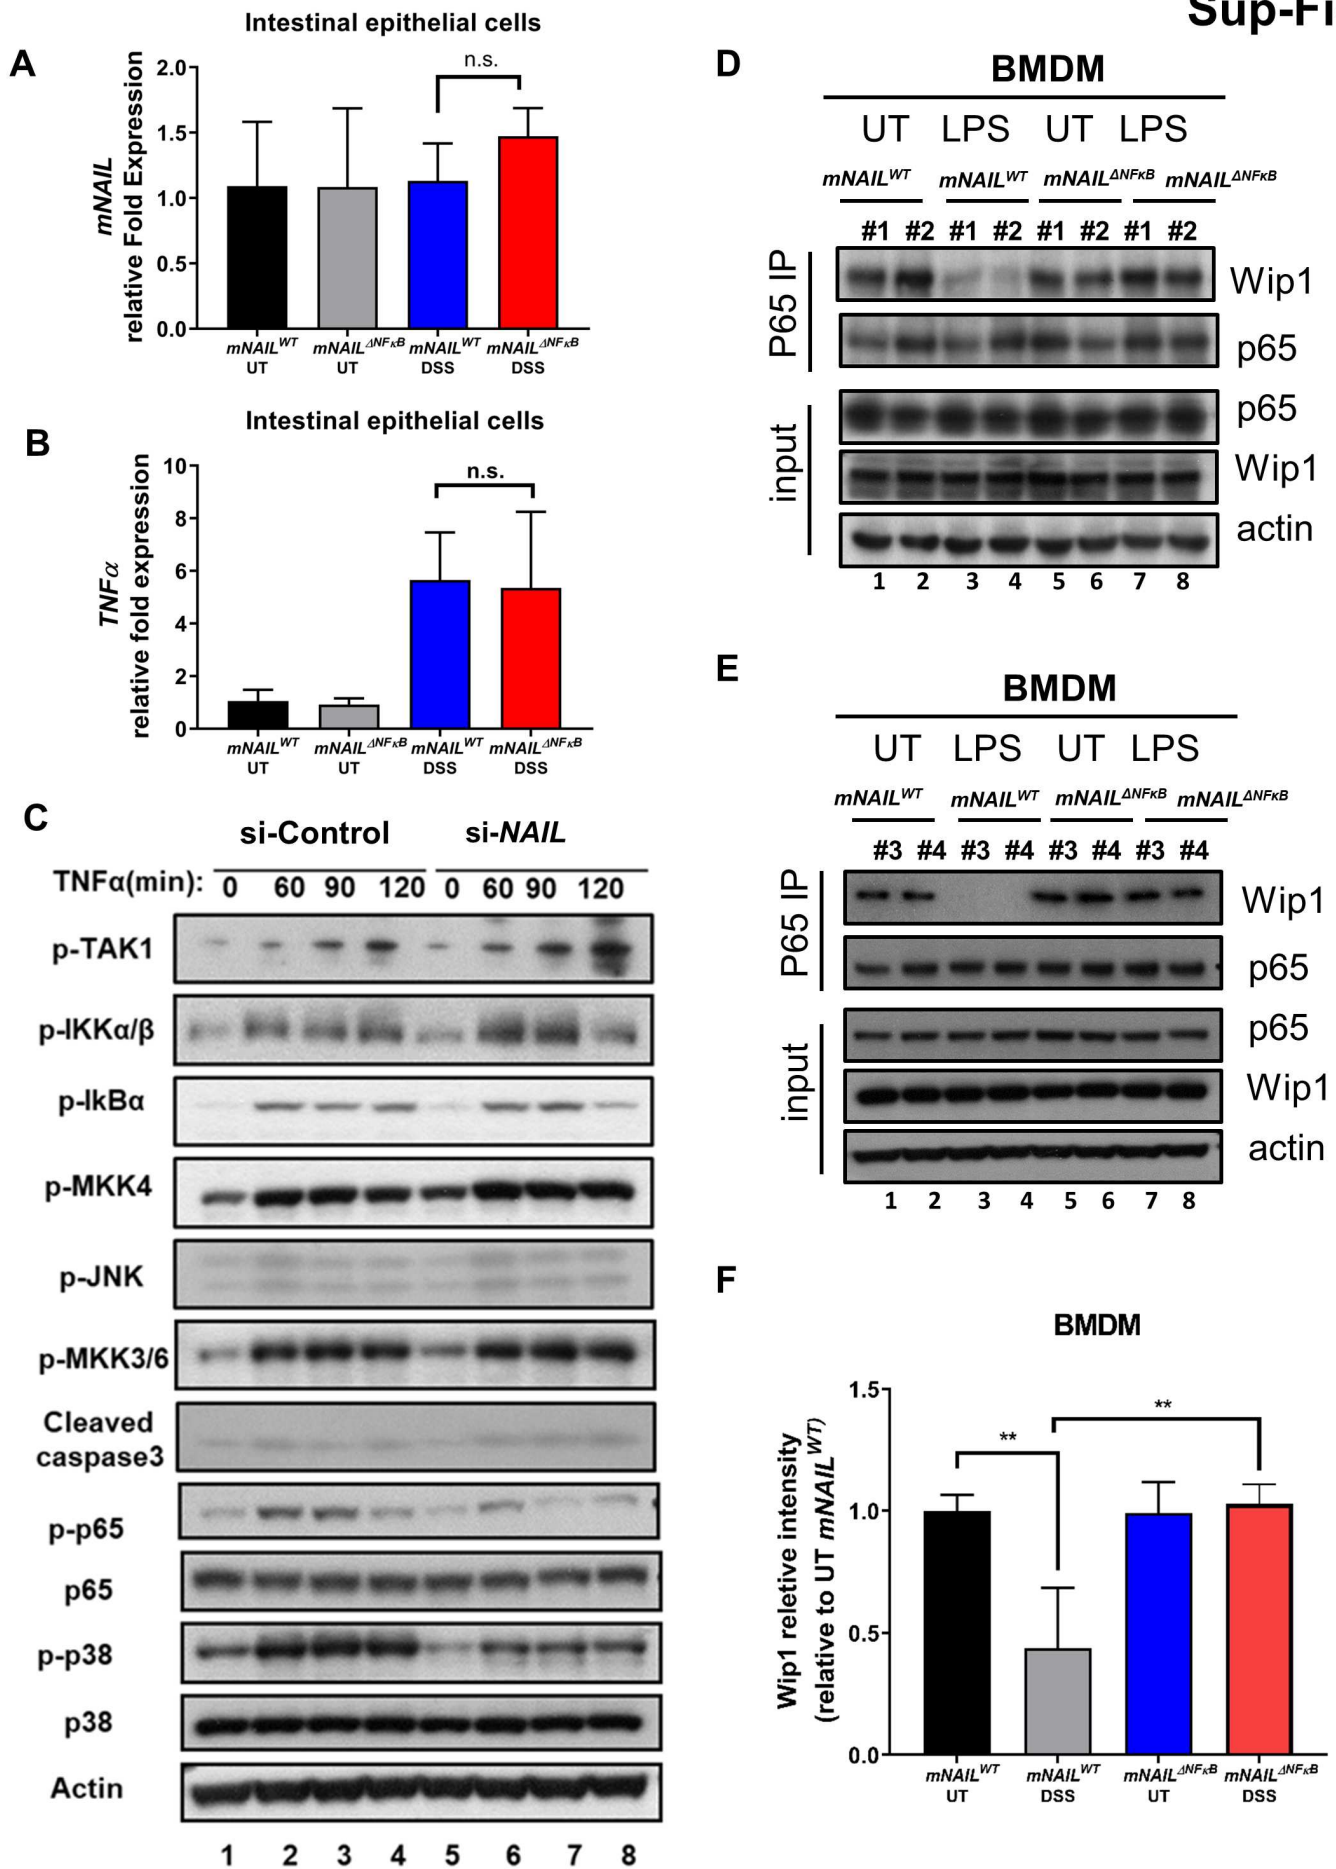

Supplement: gutjnl-2020-322980supp008_data_supplement.pdf [file gutjnl-2020-322980supp008_data_supplement.pdf]
